# Supplementary material
Source: PubMed Central journal article supplement (PMC3235416)

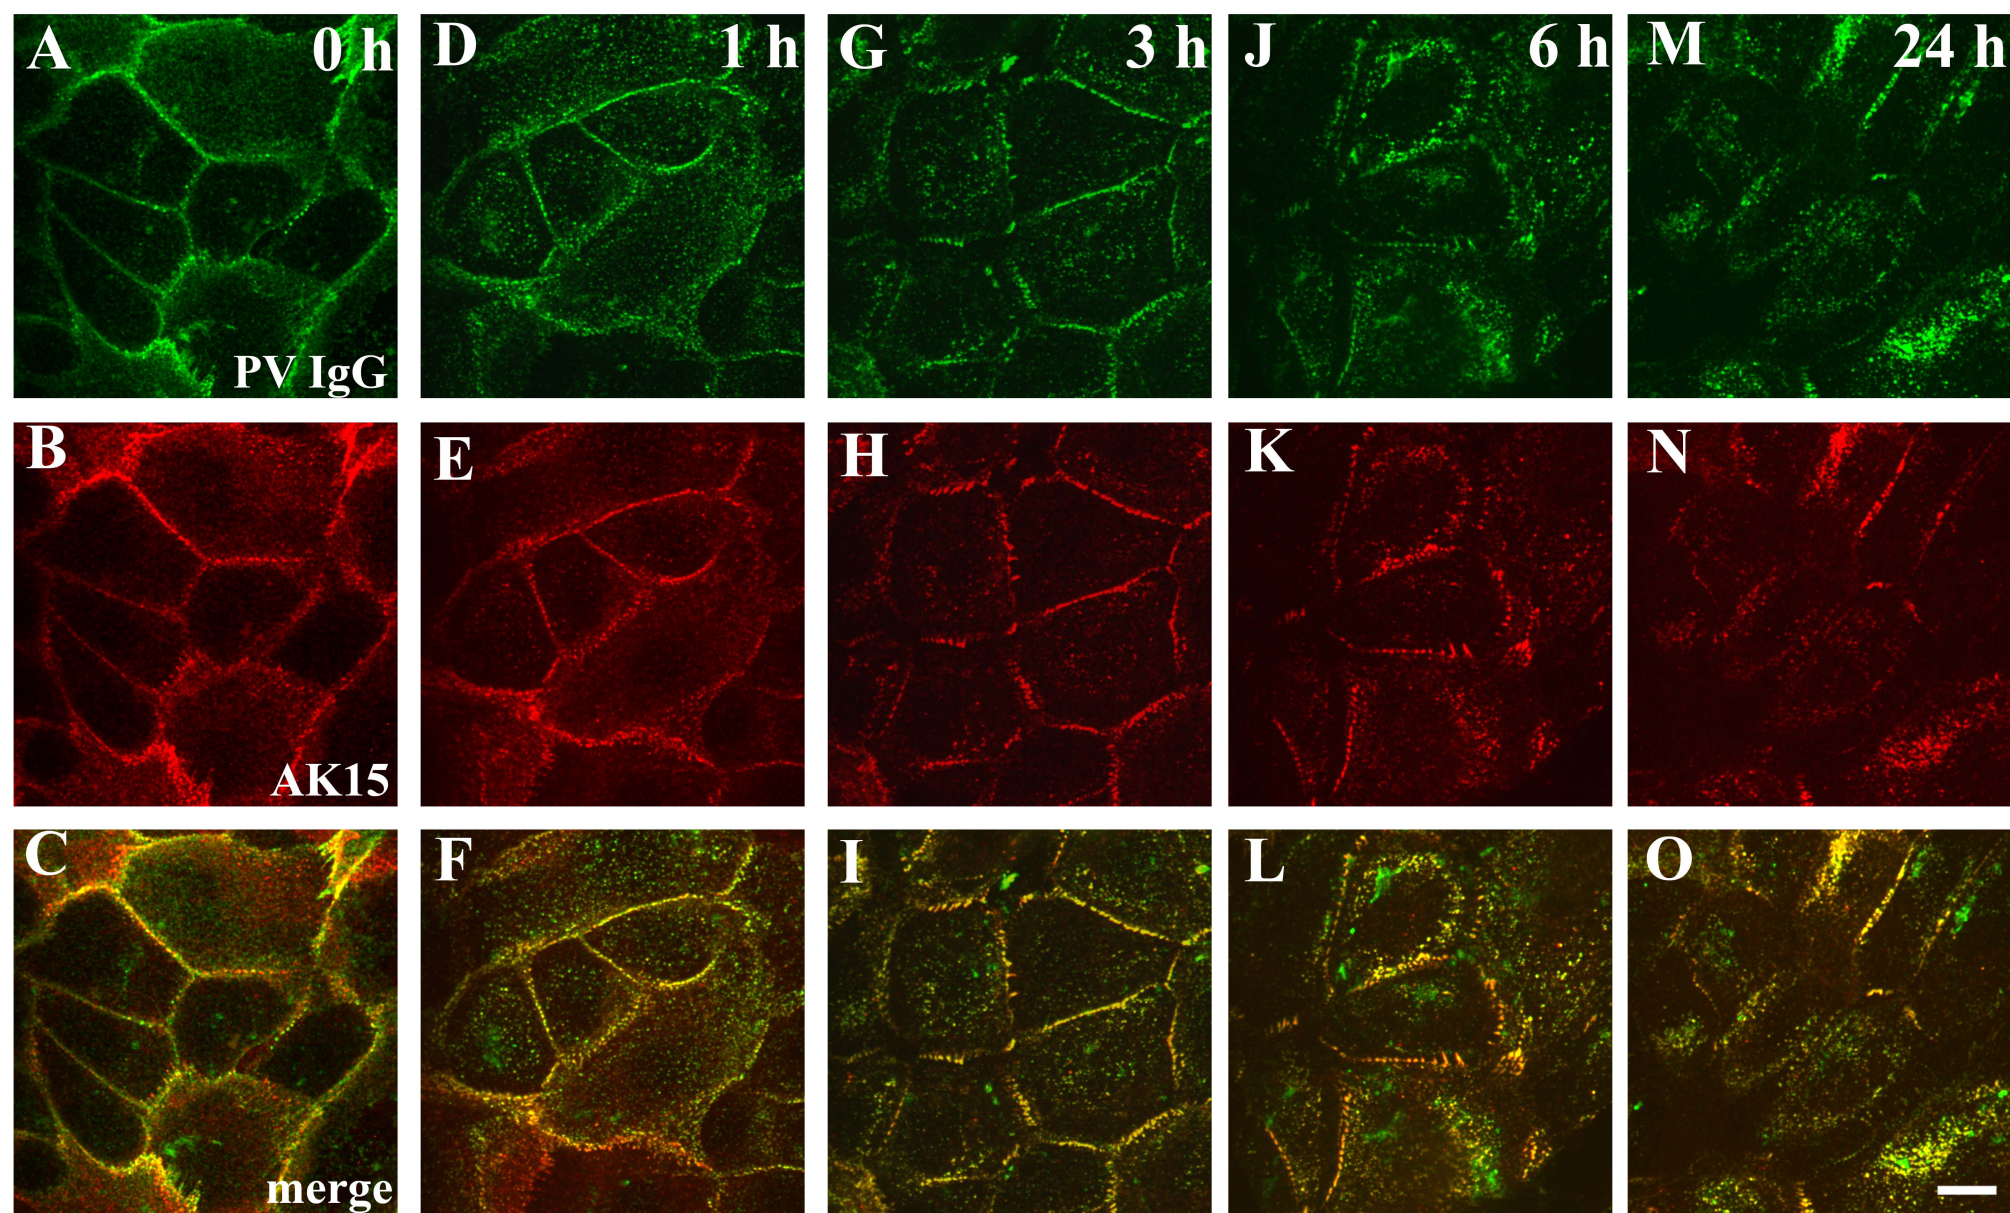

**Supplemental Figure 1**

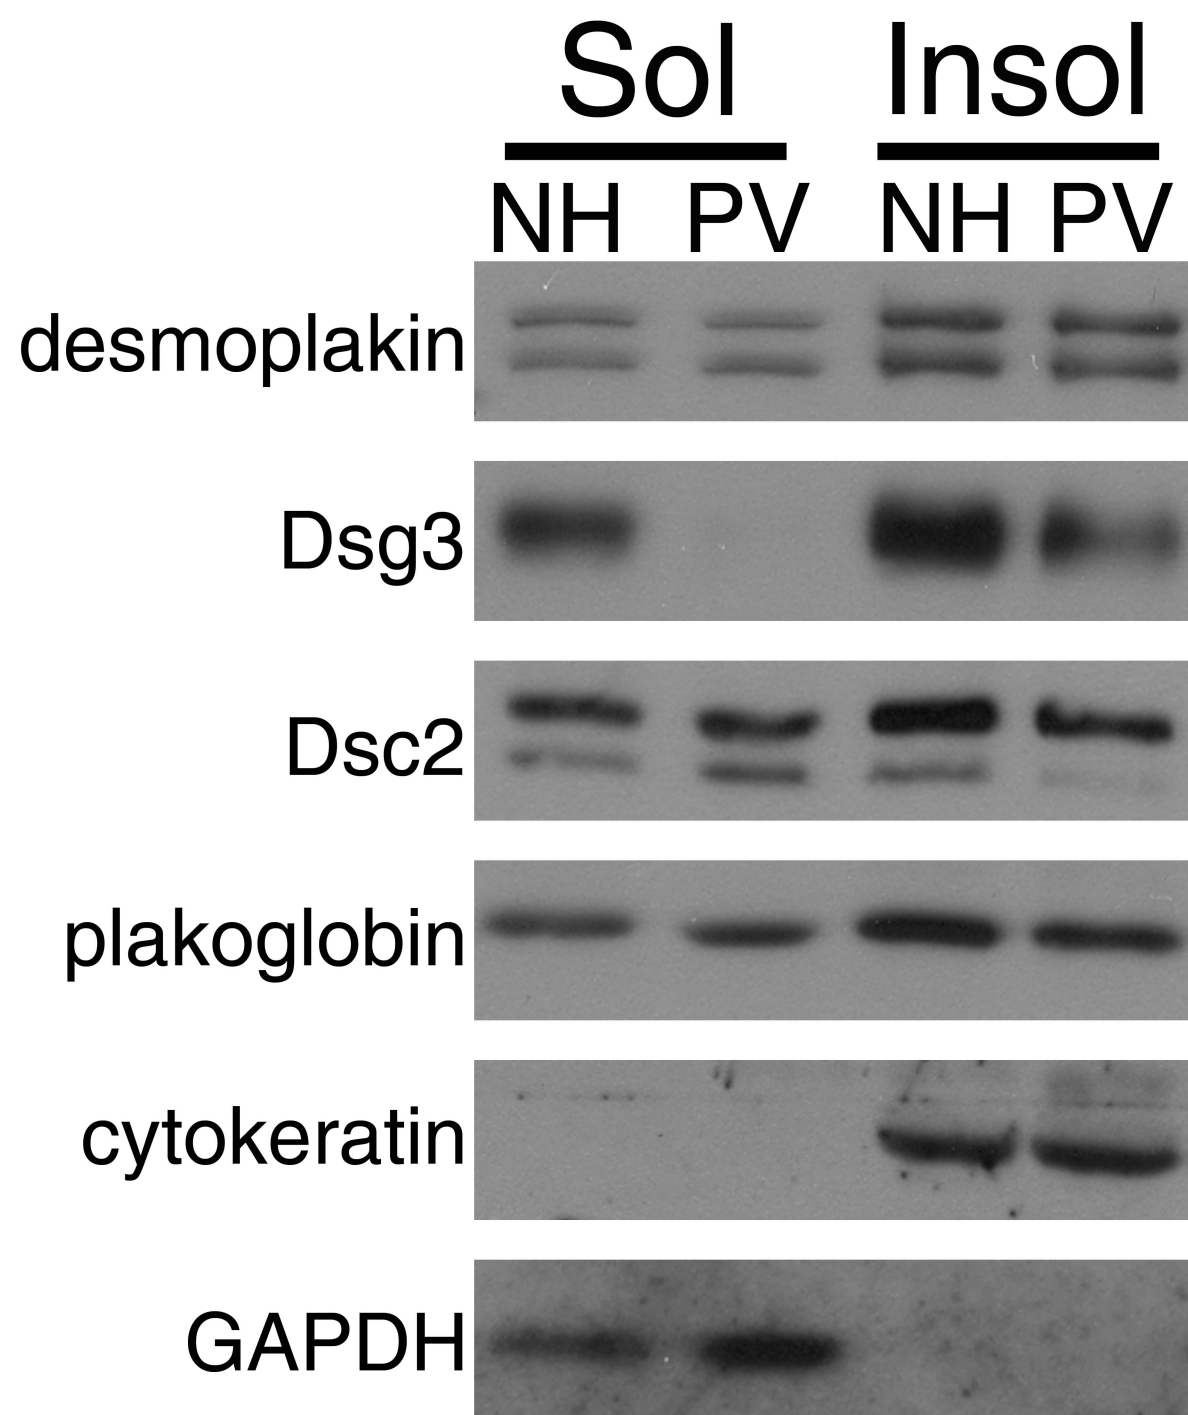

Supplemental Figure 2

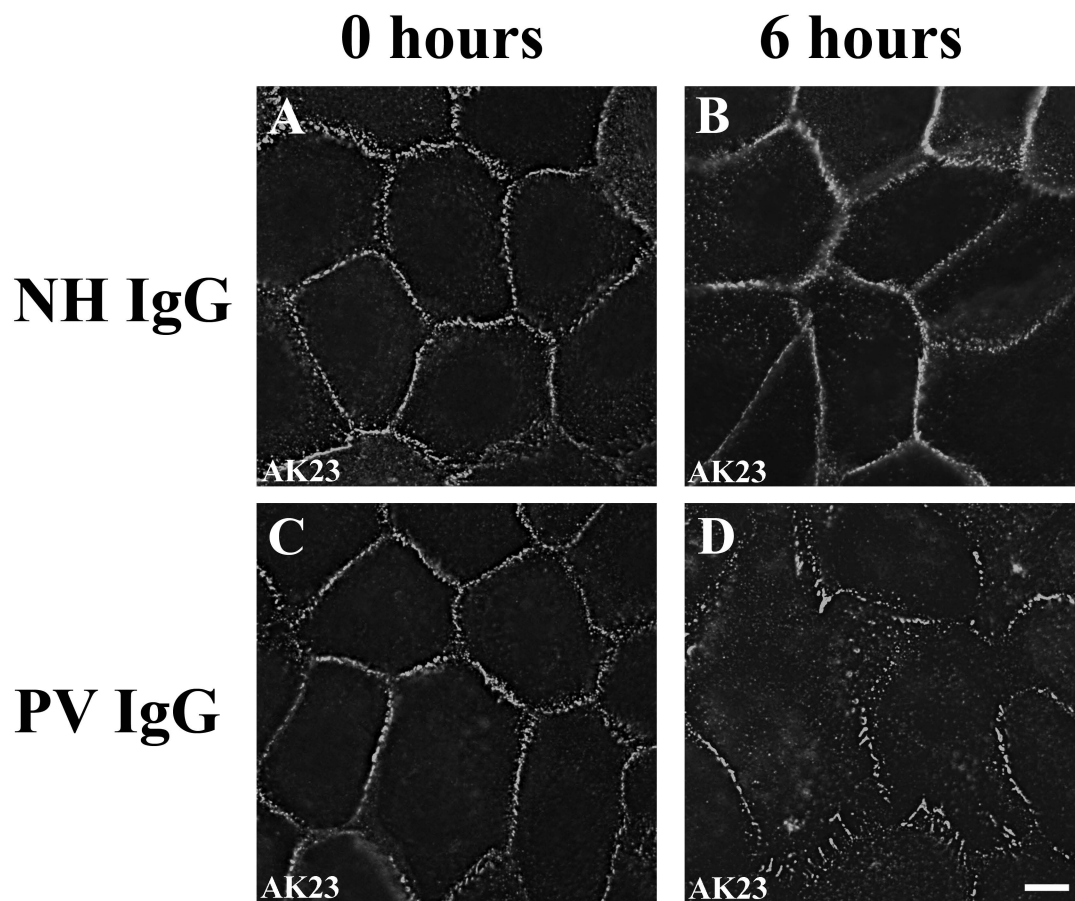

Supplemental Figure 3

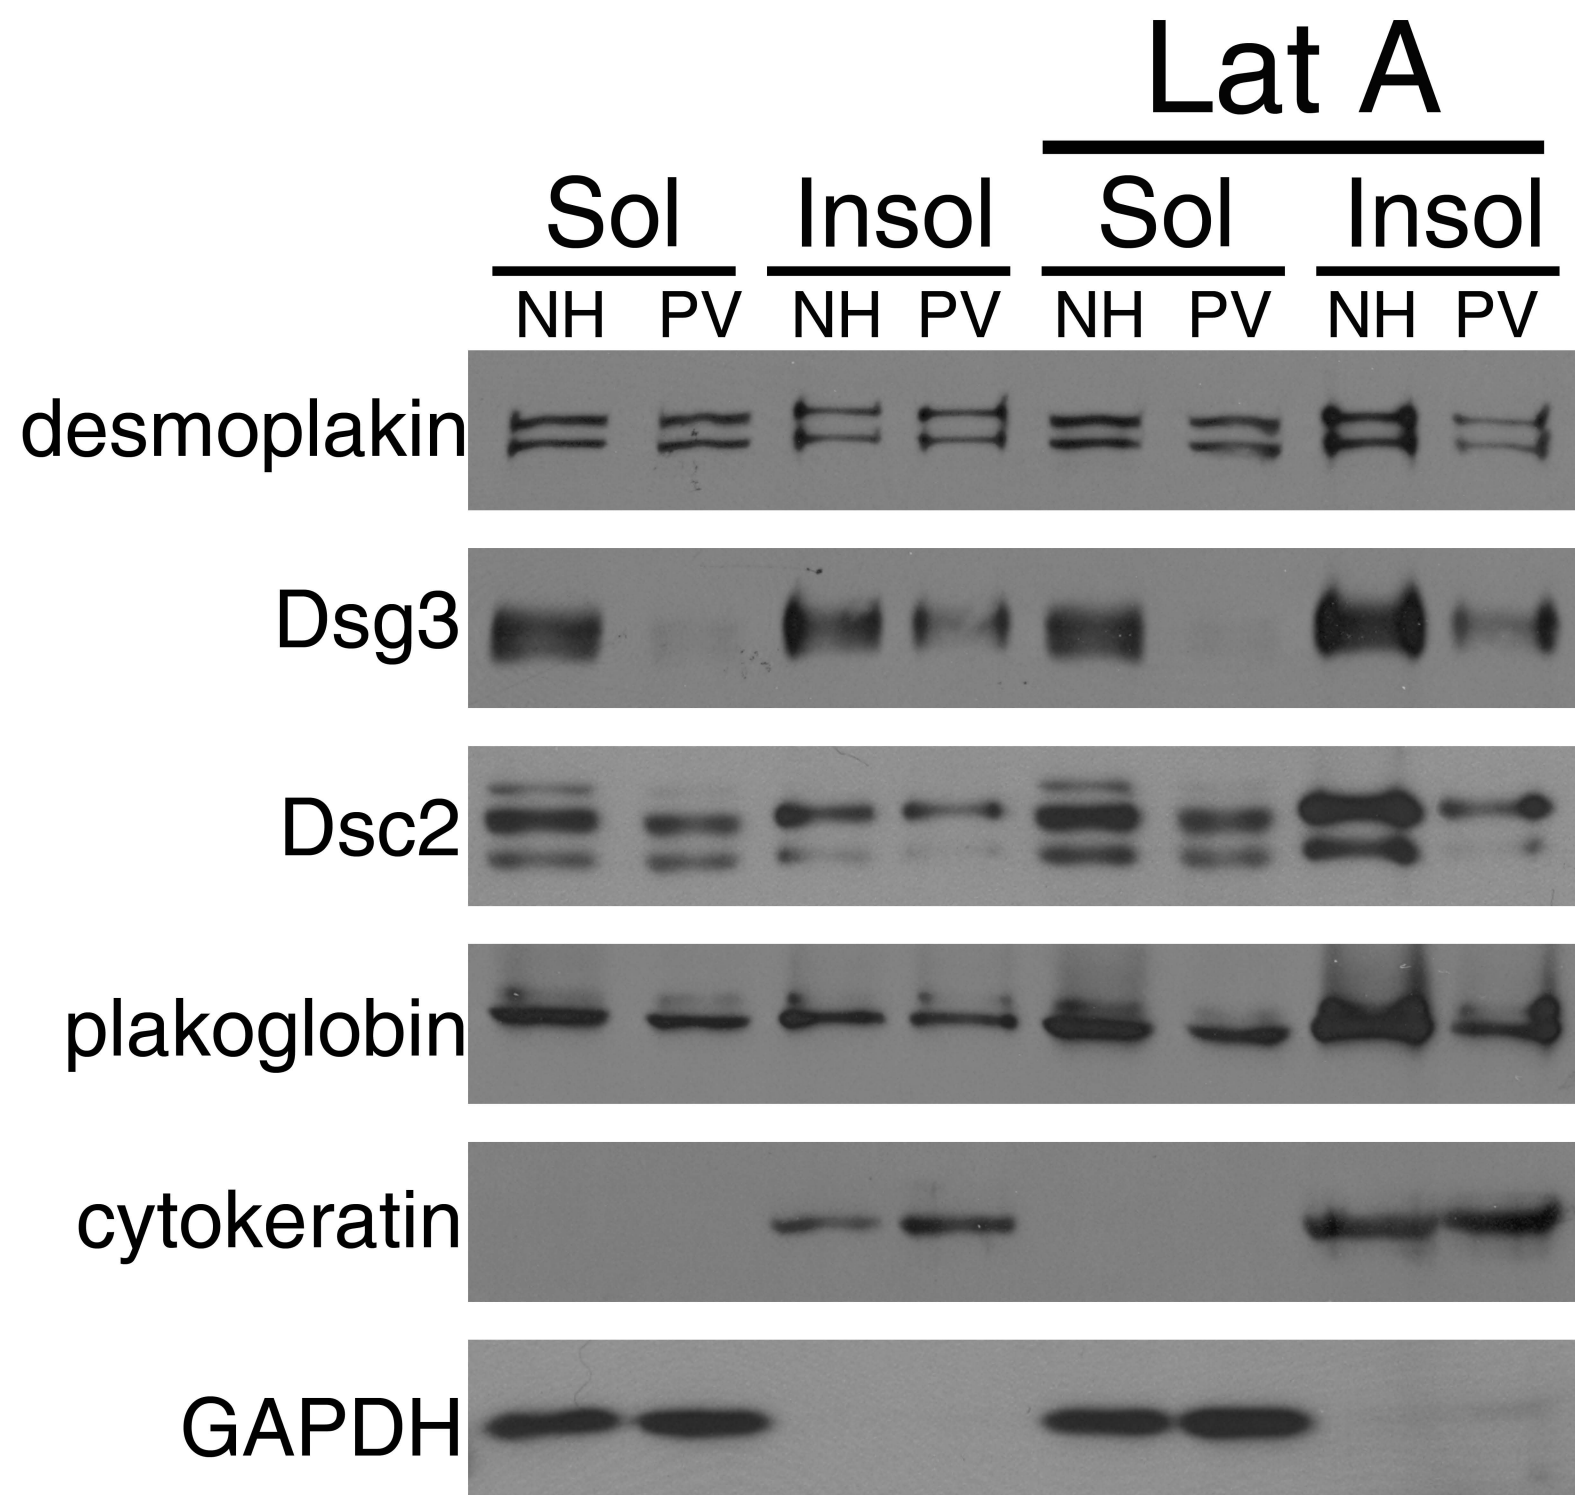

Supplemental Figure 4

Supplement: NIHMS340104-supplement-01.pdf [file NIHMS340104-supplement-01.pdf]
